# Supplementary material
Source: ML conference proceedings conference paper supplement (https://proceedings.mlr.press/v80/li18g.html)
Supplement: Supplementary file 1 [file li18g-supp.pdf]

---

## Supplementary Materials

### for “Estimation of Markov Chain via Rank-Constrained Likelihood”

---

Xudong Li<sup>1</sup> Mengdi Wang<sup>1</sup> Anru Zhang<sup>2</sup>

#### 1. Proof of Proposition 1

*Proof.* Given  $x_k = i$ ,  $x_{k+1}$  is with discrete distribution  $\mathbf{P}_{i\cdot}$ . Thus, the log-likelihood of  $x_{k+1}|x_k = \log(P_{x_k, x_{k+1}}) = \langle \log(\mathbf{P}), e_{x_k} e_{x_{k+1}}^\top \rangle$ . Then the negative log-likelihood given  $\{x_0, \dots, x_n\}$  is

$$-\sum_{k=1}^n \log(P_{x_k, x_{k+1}}) = -\sum_{k=1}^n \langle \log(\mathbf{P}), e_{x_k} e_{x_{k+1}}^\top \rangle = -\sum_{i=1}^p \sum_{j=1}^p n_{ij} \log(P_{ij}).$$

□

#### 2. Proof of Theorem 1

*Proof.* Recall  $D_{KL}(\mathbf{P}, \mathbf{Q}) = \sum_{i=1}^p \mu_i D_{KL}(P_{i\cdot}, Q_{i\cdot}) = \sum_{j=1}^p \mu_j \log(P_{ij}/Q_{ij})$ . For convenience, we also denote,

$$\tilde{D}(\mathbf{P}, \mathbf{Q}) = \frac{1}{n} \sum_{k=1}^n \langle \log(\mathbf{P}) - \log(\mathbf{Q}), \mathbf{E}_k \rangle,$$

where  $\mathbf{E}_k = e_i e_j^\top$  if the  $k$ -th jump is from States  $i$  to  $j$ . Then  $(\mathbf{E}_k)_{k=1}^n$  be independent copies such that  $P(\mathbf{E}_k = e_i e_j^\top) = \mu_i P_{ij}$ , and

$$L(\mathbf{P}) = -\frac{1}{n} \sum_{i,j=1}^p n_{ij} \log(P_{ij}) = -\frac{1}{n} \sum_{k=1}^n \log \langle \mathbf{X}, \mathbf{E}_k \rangle$$

By the property of the programming,

$$\tilde{D}(\mathbf{P}, \hat{\mathbf{P}}) = \frac{1}{n} \sum_{k=1}^n \langle \log(\mathbf{P}) - \log(\hat{\mathbf{P}}), \mathbf{E}_k \rangle = L(\hat{\mathbf{P}}) - L(\mathbf{P}) \leq 0. \quad (1)$$

Based on the assumption,  $\text{rank}(\mathbf{P}) \wedge \text{rank}(\hat{\mathbf{P}}) \leq r$ . For any  $\mathbf{Q}$  with  $\text{rank}(\mathbf{Q}) \leq r$ , we must have  $\text{rank}(\mathbf{Q} - \mathbf{P}) \leq 2r$ . Due to the duality between operator and spectral norm,

$$\|\mathbf{Q} - \mathbf{P}\|_* \leq \sqrt{2r} \|\mathbf{Q} - \mathbf{P}\|_F. \quad (2)$$

Next, we denote  $\eta = C_\eta \sqrt{\log p/n}$  for some large constant  $C_\eta > 0$ , and introduce the following deterministic set in  $\mathbb{R}^{p \times p}$ ,

$$\mathcal{C} = \{\mathbf{Q} : \alpha/p \leq Q_{ij} \leq \beta/p, \text{rank}(\mathbf{Q}) \leq r, D_{KL}(\mathbf{P}, \mathbf{Q}) \geq \eta\}.$$

---

<sup>1</sup>Department of Operations Research and Financial Engineering, Princeton University, Sherrerd Hall, Princeton, NJ 08544 <sup>2</sup>Department of Statistics, University of Wisconsin-Madison, Madison, WI 53706. Correspondence to: Xudong Li <xudongl@princeton.edu>, Mengdi Wang <mengdiw@princeton.edu>, Anru Zhang <anruzhang@stat.wisc.edu>.

We particularly aim to show next that

$$P \left\{ \forall \mathbf{Q} \in \mathcal{C}, \left| \tilde{D}(\mathbf{P}, \mathbf{Q}) - D_{KL}(\mathbf{P}, \mathbf{Q}) \right| \leq \frac{1}{2} D_{KL}(\mathbf{P}, \mathbf{Q}) + \frac{Cpr \log(p)}{n} \right\} \geq 1 - Cp^{-c}. \quad (3)$$

In order to prove (3), we first split  $\mathcal{C}$  as the union of the sets,

$$\mathcal{C}_l = \{ \mathbf{Q} \in \mathcal{C} : 2^{l-1}\eta \leq D_{KL}(\mathbf{P}, \mathbf{Q}) \leq 2^l\eta, \text{rank}(\mathbf{Q}) \leq r \}, \quad l = 1, 2, 3, \dots$$

where  $\eta$  is to be determined later. Define

$$\begin{aligned} \gamma_l &= \sup_{\mathbf{Q} \in \mathcal{C}_l} \left| D_{KL}(\mathbf{P}, \mathbf{Q}) - \tilde{D}(\mathbf{P}, \mathbf{Q}) \right| \\ &= \sup_{\mathbf{Q} \in \mathcal{C}_l} \left| \frac{1}{n} \sum_{k=1}^n \langle \log(\mathbf{P}) - \log(\mathbf{Q}), \mathbf{E}_k \rangle - \mathbb{E} \langle \log(\mathbf{P}) - \log(\mathbf{Q}), \mathbf{E}_k \rangle \right|. \end{aligned}$$

Since  $|\log(P_{ij}) - \log(Q_{ij})| \leq \log(\beta/\alpha)$ , we apply an empirical process version of Hoeffding's inequality (Theorem 14.2 in (Bühlmann & Van De Geer, 2011)),

$$P(\gamma_l - \mathbb{E}(\gamma_l) \geq 2^{l-3} \cdot \eta) \leq \exp\left(-\frac{cn \cdot 4^{l-3}\eta^2}{(\log(\beta/\alpha))^2}\right). \quad (4)$$

for constant  $c > 0$ . We generate  $\{\varepsilon_k\}_{k=1}^n$  as i.i.d. Rademacher random variables. By a symmetrization argument in empirical process,

$$\begin{aligned} \mathbb{E}\gamma_l &= \mathbb{E} \left( \sup_{\mathbf{Q} \in \mathcal{C}_l} \left| \frac{1}{n} \sum_{k=1}^n \langle \log \mathbf{P} - \log \mathbf{Q}, \mathbf{E}_k \rangle - \mathbb{E} \frac{1}{n} \sum_{k=1}^n \langle \log \mathbf{P} - \log \mathbf{Q}, \mathbf{E}_k \rangle \right| \right) \\ &\leq 2\mathbb{E} \left( \sup_{\mathbf{Q} \in \mathcal{C}_l} \left| \frac{1}{n} \sum_{k=1}^n \varepsilon_k \langle \log \mathbf{P} - \log \mathbf{Q}, \mathbf{E}_k \rangle \right| \right). \end{aligned}$$

Let  $\phi_k(t) = \alpha/p \cdot \langle \log(\mathbf{P}) - \log(\mathbf{Q} + t), \mathbf{E}_k \rangle$ , then  $\phi_k(0) = 0$  and  $|\phi'_k(t)| \leq 1$  for all  $t$  if  $t + P_{ij} \geq \alpha/p$ . In other words,  $\phi_{k,i,j}$  is a contraction map for  $t \geq \min_{i,j}(P_{ij} - \alpha/p)$ . By concentration principle (Theorem 4.12 in (Ledoux & Talagrand, 2013)),

$$\begin{aligned} \mathbb{E}(\gamma_l) &\leq \frac{2p}{\alpha} \mathbb{E} \left( \sup_{\mathbf{Q} \in \mathcal{C}_l} \left| \frac{1}{n} \sum_{k=1}^n \varepsilon_k \phi_k(\langle \mathbf{Q} - \mathbf{P}, \mathbf{E}_k \rangle) \right| \right) \\ &\leq \frac{4p}{\alpha} \mathbb{E} \left( \sup_{\mathbf{Q} \in \mathcal{C}_l} \left| \frac{1}{n} \sum_{k=1}^n \varepsilon_k \langle \mathbf{Q} - \mathbf{P}, \mathbf{E}_k \rangle \right| \right) \\ &\leq \frac{4p}{\alpha} \mathbb{E} \left( \sup_{\mathbf{Q} \in \mathcal{C}_l} \left\| \frac{1}{n} \sum_{k=1}^n \varepsilon_k \mathbf{E}_k \right\| \cdot \|\mathbf{Q} - \mathbf{P}\|_* \right) \\ &\leq \frac{4p}{\alpha} \mathbb{E} \left\| \frac{1}{n} \sum_{k=1}^n \varepsilon_k \mathbf{E}_k \right\| \cdot \sup_{\mathbf{Q} \in \mathcal{C}_l} \|\mathbf{Q} - \mathbf{P}\|_* \end{aligned} \quad (5)$$

By  $\text{rank}(\mathbf{P}) \wedge \text{rank}(\mathbf{Q}) \leq r$  and Lemma 5 in (Zhang & Wang, 2017),

$$\begin{aligned} \sup_{\mathbf{Q} \in \mathcal{C}_l} \|\mathbf{Q} - \mathbf{P}\|_* &\stackrel{(2)}{\leq} \sup_{\mathbf{Q} \in \mathcal{C}_l} \sqrt{2r} \|\mathbf{Q} - \mathbf{P}\|_F \\ &\leq \sqrt{\frac{r(\beta/p)^2}{(\alpha/p)} \sum_{i=1}^p D(P_{i\cdot}, Q_{i\cdot})} \leq \sqrt{\frac{r\beta^2}{\alpha^2} \cdot 2^l \eta}. \end{aligned} \quad (6)$$

Then we evaluate  $\mathbb{E} \left\| \frac{1}{n} \sum_{k=1}^n \varepsilon_k \mathbf{E}_k \right\|$ . Note that  $\|\mathbf{E}_k\| \leq 1$ ,

$$\begin{aligned} \left\| \sum_{k=1}^n \mathbb{E} \mathbf{E}_k^\top \mathbf{E}_k \right\| &= n \left\| \sum_{i=1}^p \sum_{j=1}^p \mu_i P_{ij} (e_i e_j^\top)^\top (e_i e_j^\top) \right\| = n \left\| \sum_{j=1}^p (\mu^\top P)_j e_j e_j^\top \right\| \\ &= n \left\| \sum_{j=1}^p \mu_j e_j e_j^\top \right\| \leq n \mu_{\max}; \\ \left\| \sum_{k=1}^n \mathbb{E} \mathbf{E}_k \mathbf{E}_k^\top \right\| &= n \left\| \sum_{i=1}^p \sum_{j=1}^p \mu_i P_{ij} (e_i e_j^\top) (e_i e_j^\top)^\top \right\| = \left\| \sum_{i=1}^p \sum_{j=1}^p \mu_i P_{ij} e_i e_i^\top \right\| \\ &= \left\| \sum_{j=1}^p \mu_j e_j e_j^\top \right\| \leq n \mu_{\max}. \end{aligned}$$

By Theorem 1 in (Tropp, 2016),

$$\mathbb{E} \left\| \frac{1}{n} \sum_{k=1}^n \varepsilon_k \mathbf{E}_k \right\| \leq \frac{C \sqrt{n \mu_{\max} \log p}}{n} + \frac{C \log p}{n} \leq C \sqrt{\frac{\mu_{\max} \log p}{n}} \leq \sqrt{\frac{\beta \log p}{np}}. \quad (7)$$

provided that  $n \geq Cp \log(p)$ . Combining (4), (5), (6), and (7), we have

$$\begin{aligned} \mathbb{E} \gamma_l &\leq C \sqrt{\frac{pr \log p}{n}} \cdot 2^l \eta \leq C^2 \frac{pr \log p}{2n} + 2^{l-3} \eta, \\ P \left( \gamma_l \geq 2^{l-2} \eta + \frac{Cpr \log p}{n} \right) &\leq \exp(-cn \cdot 4^l \eta^2). \end{aligned}$$

Now,

$$\begin{aligned} &P \left( \exists \mathbf{Q} \in \mathcal{C}, \left| \tilde{D}(\mathbf{P}, \mathbf{Q}) - D_{KL}(\mathbf{P}, \mathbf{Q}) \right| > \frac{1}{2} D_{KL}(\mathbf{P}, \mathbf{Q}) + \frac{Cpr \log(p)}{n} \right) \\ &\leq \sum_{l=0}^{\infty} P \left( \exists \mathbf{Q} \in \mathcal{C}_l, \left| \tilde{D}(\mathbf{P}, \mathbf{Q}) - D_{KL}(\mathbf{P}, \mathbf{Q}) \right| > \frac{1}{2} D_{KL}(\mathbf{P}, \mathbf{Q}) + \frac{Cpr \log(p)}{n} \right) \\ &\leq \sum_{l=0}^{\infty} P \left( \exists \mathbf{Q} \in \mathcal{C}_l, \gamma_l > 2^{l-2} \eta + \frac{Cpr \log(p)}{n} \right) \\ &\leq \sum_{l=0}^{\infty} \exp(-c \cdot C_\eta \cdot 4^l \log p) \leq \exp(-c \cdot C_\eta l \log(p)) \leq Cp^{-c} \end{aligned}$$

provided reasonably large  $C_\eta > 0$ . Thus, we have obtained (3).

Finally, it remains to bound the errors for  $\|\hat{\mathbf{P}} - \mathbf{P}\|_F$  and  $D_{KL}(\mathbf{P}, \hat{\mathbf{P}})$  given (3). In fact, provided that (3) holds,

- if  $\hat{\mathbf{P}} \notin \mathcal{C}$ , we have  $D_{KL}(\mathbf{P}, \hat{\mathbf{P}}) \leq C \sqrt{\frac{\log p}{n}}$ ;
- if  $\hat{\mathbf{P}} \in \mathcal{C}$ , by (3),

$$D_{KL}(\mathbf{P}, \hat{\mathbf{P}}) \leq \tilde{D}(\mathbf{P}, \hat{\mathbf{P}}) + \frac{Cpr \log p}{n} \stackrel{(1)}{\leq} \frac{Cpr \log p}{n}.$$

To sum up, we must have

$$D_{KL}(\mathbf{P}, \hat{\mathbf{P}}) \leq C \sqrt{\frac{\log p}{n}} + \frac{Cpr \log p}{n}.$$

with probability at least  $1 - Cp^{-c}$ . For Frobenius norm error, we shall note that

$$\begin{aligned} \|\hat{\mathbf{P}} - \mathbf{P}\|_F^2 &\leq \sum_{i=1}^p \|P_{i\cdot} - \hat{P}_{i\cdot}\|_2^2 \leq \sum_{i=1}^p \frac{2\beta^2}{\alpha p} D_{KL}(P_{i\cdot}, \hat{P}_{i\cdot}) \\ &\leq \sum_{i=1}^p \frac{2\beta^2}{\alpha^2} \mu_i D_{KL}(P_{i\cdot}, \hat{P}_{i\cdot}) = \frac{\beta^2}{\alpha^2} D_{KL}(\mathbf{P}, \hat{\mathbf{P}}). \end{aligned}$$

Therefore, we have finished the proof for Theorem 1.  $\square$

### 3. Proof of Theorem 2

*Proof.* Based on the proof of Theorem 1 in (Zhang & Wang, 2017), one has

$$\inf_{\hat{\mathbf{P}}} \sup_{\mathbf{P} \in \bar{\mathcal{P}}} \frac{1}{p} \sum_{i=1}^p \mathbb{E} \|\hat{P}_{i\cdot} - P_{i\cdot}\|_1 \geq c \left( \sqrt{\frac{rp}{n}} \wedge 1 \right),$$

where  $\bar{\mathcal{P}} = \{\mathbf{P} \in \mathcal{P} : 1/(2p) \leq P_{ij} \leq 3/(2p)\} \subseteq \mathcal{P}$ . By Cauchy Schwarz inequality,

$$\sum_{i=1}^p \|\hat{P}_{i\cdot} - P_{i\cdot}\|_1 = \sum_{i,j=1}^p |\hat{P}_{ij} - P_{ij}| \leq p \sqrt{\sum_{i,j=1}^p (\hat{P}_{ij} - P_{ij})^2},$$

Thus,

$$\inf_{\hat{\mathbf{P}}} \sup_{\mathbf{P} \in \bar{\mathcal{P}}} \mathbb{E} \sum_{i=1}^p \|\hat{P}_{i\cdot} - P_{i\cdot}\|_2^2 \geq \left( \inf_{\hat{\mathbf{P}}} \sup_{\mathbf{P} \in \bar{\mathcal{P}}} \mathbb{E} \sum_{i=1}^p \frac{1}{p} \|\hat{P}_{i\cdot} - P_{i\cdot}\|_1 \right)^2 \geq c \left( \frac{rp}{n} \wedge 1 \right) \geq \frac{cpr}{n}.$$

The lower bound for KL divergence essentially follows due to the inequalities between  $\ell_2$  and KL-divergence for bounded vectors in Lemma 5 of (Zhang & Wang, 2017).  $\square$

### 4. Proof of Theorem 3

*Proof.* Let  $\hat{\mathbf{U}}_{\perp}, \hat{\mathbf{V}}_{\perp} \in \mathbb{R}^{p \times (p-r)}$  be the orthogonal complement of  $\hat{\mathbf{U}}$  and  $\hat{\mathbf{V}}$ . Since  $\mathbf{U}, \mathbf{V}, \hat{\mathbf{U}}$ , and  $\hat{\mathbf{V}}$  are the leading left and right singular vectors of  $\mathbf{P}$  and  $\hat{\mathbf{P}}$ , we have

$$\|\hat{\mathbf{P}} - \mathbf{P}\|_F \geq \|\hat{\mathbf{U}}_{\perp}^{\top} (\hat{\mathbf{P}} - \mathbf{U}\mathbf{U}^{\top}\mathbf{P})\|_F = \|\hat{\mathbf{U}}_{\perp}^{\top} \mathbf{U}\mathbf{U}^{\top}\mathbf{P}\|_F \geq \|\hat{\mathbf{U}}_{\perp}^{\top} \mathbf{U}\|_F \cdot \sigma_r(\mathbf{U}^{\top}\mathbf{P}) = \|\sin \Theta(\hat{\mathbf{U}}, \mathbf{U})\|_F \cdot \sigma_r(\mathbf{P}).$$

Similar argument also applies to  $\|\sin \Theta(\hat{\mathbf{V}}, \mathbf{V})\|_F$ . Thus,

$$\max\{\|\sin \Theta(\hat{\mathbf{U}}, \mathbf{U})\|_F, \|\sin \Theta(\hat{\mathbf{V}}, \mathbf{V})\|_F\} \leq \min\left\{\frac{\|\hat{\mathbf{P}} - \mathbf{P}\|_F}{\sigma_r(\mathbf{P})}, \sqrt{r}\right\}.$$

The rest of the proof immediately follows from Theorem 1.  $\square$

### 5. Proof of Proposition 2

*Proof.* Since  $\text{rank}(\mathbf{X}_c^*) \leq r$ , we know that  $\mathbf{X}_c^*$  is in fact a feasible solution to the original problem (5) and  $\|\mathbf{X}_c^*\|_* - \|\mathbf{X}_c^*\|_{(r)} = 0$ . Therefore, for any feasible solution  $\mathbf{X}$  to (5), it holds that

$$\begin{aligned} f(\mathbf{X}_c^*) &= f(\mathbf{X}_c^*) + c(\|\mathbf{X}_c^*\|_* - \|\mathbf{X}_c^*\|_{(r)}) \\ &\leq f(\mathbf{X}) + c(\|\mathbf{X}\|_* - \|\mathbf{X}\|_{(r)}) = f(\mathbf{X}). \end{aligned}$$

This completes the proof of the proposition.  $\square$

## 6. Proof of Theorem 5 (Convergence of sGS-ADMM)

*Proof.* In order to use (Li et al., 2016b, Theorem 3), we need to write problem (D) as following

$$\begin{aligned} \min \quad & f^*(-\Xi) - \langle b, y \rangle + \delta(\mathbf{S} \mid \|\mathbf{S}\|_2 \leq c) + \frac{\alpha}{2} \|\mathbf{Z}\|_F^2 \\ \text{s.t.} \quad & \mathcal{F}(\Xi) + \mathcal{A}_1^*(y) + \mathcal{G}(\mathbf{S}) + \mathcal{B}_1^*(\mathbf{Z}) = \mathbf{W}, \end{aligned}$$

where  $\mathcal{F}, \mathcal{A}_1, \mathcal{G}$  and  $\mathcal{B}_1$  are linear operators such that for all  $(\Xi, y, \mathbf{S}, \mathbf{Z}) \in \mathbb{R}^{p \times p} \times \mathbb{R}^n \times \mathbb{R}^{p \times p} \times \mathbb{R}^{p \times p}$ ,  $\mathcal{F}(\Xi) = \Xi$ ,  $\mathcal{A}_1^*(y) = \mathcal{A}^*(y)$ ,  $\mathcal{G}(\mathbf{S}) = \mathbf{S}$  and  $\mathcal{B}_1^*(\mathbf{Z}) = \alpha \mathbf{Z}$ . Clearly,  $\mathcal{F} = \mathcal{G} = \mathcal{I}$  and  $\mathcal{B}_1 = \alpha \mathcal{I}$  where  $\mathcal{I} : \mathbb{R}^{p \times p} \rightarrow \mathbb{R}^{p \times p}$  is the identity map. Therefore, we have  $\mathcal{A}_1 \mathcal{A}_1^* \succ 0$  and  $\mathcal{F} \mathcal{F}^* = \mathcal{G} \mathcal{G}^* = \mathcal{I} \succ 0$ . Note that if  $\alpha > 0$ ,  $\mathcal{B}_1 \mathcal{B}_1^* = \alpha^2 \mathcal{I} \succ 0$ . Hence, the assumptions and conditions in (Li et al., 2016b, Theorem 3) are satisfied whenever  $\alpha \geq 0$ . The convergence results thus follow directly.  $\square$

## 7. Proof of Theorems 4 and 6

We only need to prove Theorem 6 as Theorem 4 is a special incidence. To prove Theorem 6, we first introduce the following lemma.

**Lemma 1.** *Suppose that  $\{x^k\}$  is the sequence generated by Algorithm 3. Then  $\theta(x^{k+1}) \leq \theta(x^k) - \frac{1}{2} \|x^{k+1} - x^k\|_{\mathcal{G}+2\mathcal{T}}^2$ .*

*Proof.* For any  $k \geq 0$ , by the optimality condition of problem (10) at  $x^{k+1}$ , we know that there exist  $\eta^{k+1} \in \partial p(x^{k+1})$  such that

$$0 = \nabla g(x^k) + (\mathcal{G} + \mathcal{T})(x^{k+1} - x^k) + \eta^{k+1} - \xi^k = 0.$$

Then for any  $k \geq 0$ , we deduce

$$\begin{aligned} \theta(x^{k+1}) - \theta(x^k) &\leq \widehat{\theta}(x^{k+1}; x^k) - \theta(x^k) \\ &= p(x^{k+1}) - p(x^k) + \langle x^{k+1} - x^k, \nabla g(x^k) - \xi^k \rangle \\ &\quad + \frac{1}{2} \|x^{k+1} - x^k\|_{\mathcal{G}}^2 \\ &\leq \langle \nabla g(x^k) + \eta^{k+1} - \xi^k, x^{k+1} - x^k \rangle + \frac{1}{2} \|x^{k+1} - x^k\|_{\mathcal{G}}^2 \\ &= -\frac{1}{2} \|x^{k+1} - x^k\|_{\mathcal{G}+2\mathcal{T}}^2. \end{aligned}$$

This completes the proof of this lemma.  $\square$

Now we are ready to prove Theorem 6.

*Proof.* From the optimality condition at  $x^{k+1}$ , we have that

$$0 \in \nabla g(x^k) + (\mathcal{G} + \mathcal{T})(x^{k+1} - x^k) + \partial p(x^{k+1}) - \xi^k.$$

Since  $x^{k+1} = x^k$ , this implies that

$$0 \in \nabla g(x^k) + \partial p(x^k) - \xi^k,$$

i.e.,  $x^k$  is a critical point. Observe that the sequence  $\{\theta(x^k)\}$  is non-increasing since

$$\theta(x^{k+1}) \leq \widehat{\theta}(x^{k+1}; x^k) \leq \widehat{\theta}(x^k; x^k) = \theta(x^k), \quad k \geq 0.$$

Suppose that there exists a subsequence  $\{x^{k_j}\}$  that converging to  $\bar{x}$ , i.e., one of the accumulation points of  $\{x^k\}$ . By Lemma 1 and the assumption that  $\mathcal{G} + 2\mathcal{T} \succeq 0$ , we know that for all  $x \in \mathbb{X}$

$$\begin{aligned} \widehat{\theta}(x^{k_j+1}; x^{k_j+1}) &= \theta(x^{k_j+1}) \\ &\leq \theta(x^{k_j+1}) \leq \widehat{\theta}(x^{k_j+1}; x^{k_j}) \leq \widehat{\theta}(x; x^{k_j}). \end{aligned}$$

By letting  $j \rightarrow \infty$  in the above inequality, we obtain that

$$\widehat{\theta}(\bar{x}; \bar{x}) \leq \widehat{\theta}(x; \bar{x}).$$

By the optimality condition of  $\widehat{\theta}(x; \bar{x})$ , we have that there exists  $\bar{u} \in \partial p(\bar{x})$  and  $\bar{v} \in \partial q(\bar{x})$  such that

$$0 \in \nabla g(\bar{x}) + \bar{u} - \bar{v}$$

This implies that  $(\nabla g(\bar{x}) + \partial p(\bar{x})) \cap \partial q(\bar{x}) \neq \emptyset$ . To establish the rest of this proposition, we obtain from Lemma 1 that

$$\begin{aligned} & \lim_{t \rightarrow +\infty} \frac{1}{2} \sum_{i=0}^t \|x^{k+1} - x^k\|_{\mathcal{G}+2\mathcal{T}}^2 \\ & \leq \liminf_{t \rightarrow +\infty} (\theta(x^0) - \theta(x^{k+1})) \leq \theta(x^0) < +\infty, \end{aligned}$$

which implies  $\lim_{i \rightarrow +\infty} \|x^{k+1} - x^i\|_{\mathcal{G}+2\mathcal{T}} = 0$ . The proof of this theorem is thus complete by the positive definiteness of the operator  $\mathcal{G} + 2\mathcal{T}$ .  $\square$

## 8. Discussions on $\mathcal{G}$ and $\mathcal{T}$

Here, we discuss the roles of  $\mathcal{G}$  and  $\mathcal{T}$ . The majorization technique used to handle the smooth function  $g$  and the presence of  $\mathcal{G}$  are used to make the subproblems (10) in Algorithm (3) more amenable to efficient computations. As can be observed in Theorem 6, the algorithm is convergent if  $\mathcal{G} + 2\mathcal{T} \succeq 0$ . This indicates that instead of adding the commonly used positive semidefinite or positive definite proximal terms, we allow  $\mathcal{T}$  to be indefinite for better practical performance. Indeed, the computational benefit of using indefinite proximal terms has been observed in (Gao & Sun, 2010; Li et al., 2016a). In fact, the introduction of indefinite proximal terms in the DC algorithm is motivated by these numerical evidence. As far as we know, Theorem 6 provides the first rigorous convergence proof of the introduction of the indefinite proximal terms in the DC algorithms. The presence of  $\mathcal{G}$  and  $\mathcal{T}$  also helps to guarantee the existence of solutions for the subproblems (10). Since  $\mathcal{G} + 2\mathcal{T} \succeq 0$  and  $\mathcal{G} \succeq 0$ , we have that  $2\mathcal{G} + 2\mathcal{T} \succeq 0$ , i.e.,  $\mathcal{G} + \mathcal{T} \succeq 0$  (the reverse direction holds when  $\mathcal{T} \succeq 0$ ). Hence,  $\mathcal{G} + 2\mathcal{T} \succeq 0$  ( $\mathcal{G} + 2\mathcal{T} \succ 0$ ) implies that subproblems (10) are (strongly) convex problems. Meanwhile, the choices of  $\mathcal{G}$  and  $\mathcal{T}$  are very much problem dependent. The general principle is that  $\mathcal{G} + \mathcal{T}$  should be as small as possible while  $x^{k+1}$  is still relatively easy to compute.

## References

- Bühlmann, Peter and Van De Geer, Sara. *Statistics for High-Dimensional Data: Methods, Theory and Applications*. Springer Science & Business Media, 2011.
- Gao, Yan and Sun, Defeng. A majorized penalty approach for calibrating rank constrained correlation matrix problems. *technical report*, 2010.
- Ledoux, Michel and Talagrand, Michel. *Probability in Banach Spaces: Isoperimetry and Processes*. Springer Science & Business Media, 2013.
- Li, Min, Sun, Defeng, and Toh, Kim-Chuan. A majorized ADMM with indefinite proximal terms for linearly constrained convex composite optimization. *SIAM Journal on Optimization*, 26(2):922–950, 2016a.
- Li, Xudong, Sun, Defeng, and Toh, Kim-Chuan. A Schur complement based semi-proximal ADMM for convex quadratic conic programming and extensions. *Mathematical Programming*, 155(1-2):333–373, 2016b.
- Tropp, Joel A. The expected norm of a sum of independent random matrices: An elementary approach. In *High Dimensional Probability VII*, pp. 173–202. Springer, 2016.
- Zhang, Anru and Wang, Mengdi. Spectral state compression of Markov processes. *arXiv preprint arXiv:1802.02920*, 2017.
